# Supplementary material for: Anomalous Thermal Characteristics of Poly(ionic liquids) Derived from 1-Butyl-2,3-dimethyl-4-vinylimidazolium Salts
Source: MDPI journal article supplement (doi:10.3390/polym14020254), 2022-01-08
Supplement: s1 [file s1]

**Anomalous Thermal Characteristics of Poly(ionic liquids)  
Derived from 1-Butyl-2,3-Dimethyl-4-Vinylimidazolium Salts**

*Fan Yang<sup>i</sup>, Meng Zhao<sup>ii</sup>, Darren Smith<sup>iii</sup>, Peggy Cebe<sup>iv</sup>, Sam Lucisano<sup>v</sup>, Thomas Allston<sup>vi</sup>, and Thomas W. Smith,<sup>vi</sup> \**

Versick Analytics, <sup>i</sup> Jersey City, NJ

BOE Technology Group, <sup>ii</sup> Beijing China

Experimental Therapeutics Branch, Walter Reed Army Institute of Research, <sup>iii</sup>

Silver Spring, MD 20910

Physics and Astronomy Department, Tufts University, <sup>iv</sup> Medford, MA, 02155

Xerox Corporation, <sup>v</sup> Webster, NY

School of Chemistry & Materials Science, Rochester Institute of Technology <sup>vi</sup>

*\*Correspondence to: twssch@rit.edu*

## Supplementary Information

Thermal gravimetric analysis (TGA) was carried out under a nitrogen atmosphere with a TA Instruments TGA 2050. The temperature was increased from 25-600°C at 20°C/min under a nitrogen atmosphere, and then held at 600°C for 10 minutes under an air atmosphere. TGA mass loss profiles for triflate and TFSI<sup>-</sup> salts of poly(1-butyl-2,3-dimethylimidazolium) are shown in Figure S1. The thermal stability of the triflate and TFSI<sup>-</sup> salts is similar. Significant mass loss in the TFSI<sup>-</sup> salt occurs between 430 and 505 °C; that in the triflate salt occurs between 440 and 505°C.

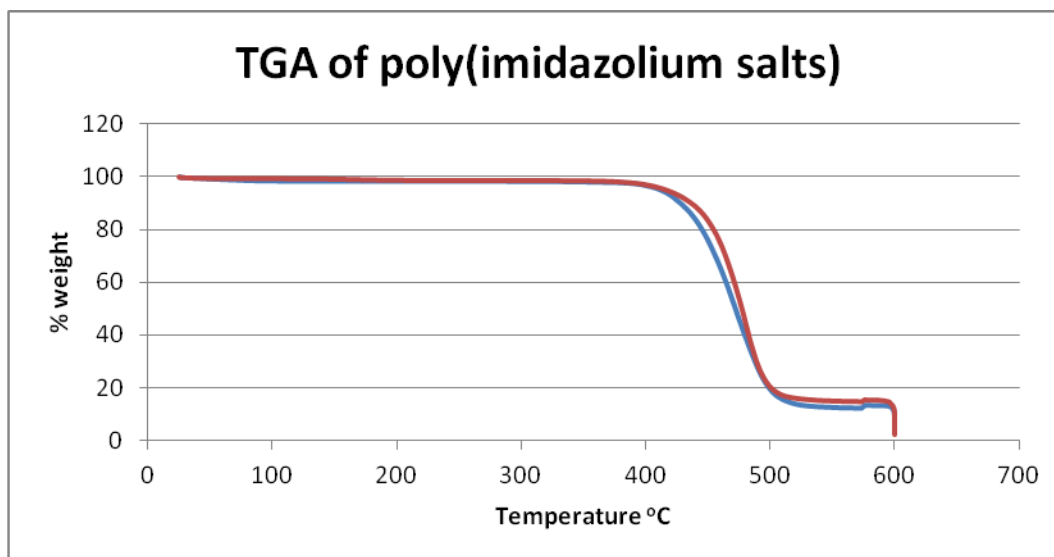

**Figure S1** - TGA of poly(1-butyl-2,3-dimethyl-4-vinylimidazolium triflate)(red) and poly(1-butyl-2,3-dimethyl-4-vinylimidazolium TFSI)(blue).

Glass transition characteristics of poly(1-butyl-2,3-dimethyl-4-vinylimidazolium) triflate, hexafluorophosphate and trifluoromethylsulfonylimide salts were evaluated by differential scanning calorimetry. DSC thermograms for the triflate polymer are shown in **Figure S2** where plots of change in heat capacity in 20 °C/min heating and cooling cycles and an auxiliary 40 °C/min rapid heating cycle are shown.

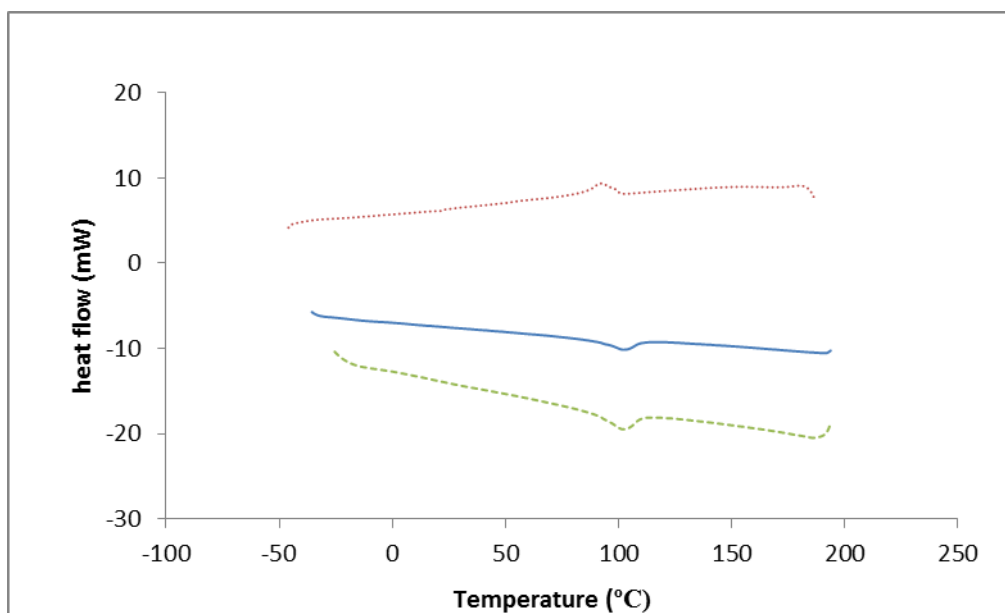

**Figure S2** - DSC scans of P23DMVIm<sup>+</sup> Tf<sup>-</sup> : solid blue line (20°C/min – heating cycle), dotted red line (20°C/min – cooling cycle), dashed green line (40°C/min – rapid heating cycle).

Thermograms for the TFSI and hexafluorophosphate polymer salts are displayed in Figure S3 and S4, respectively.

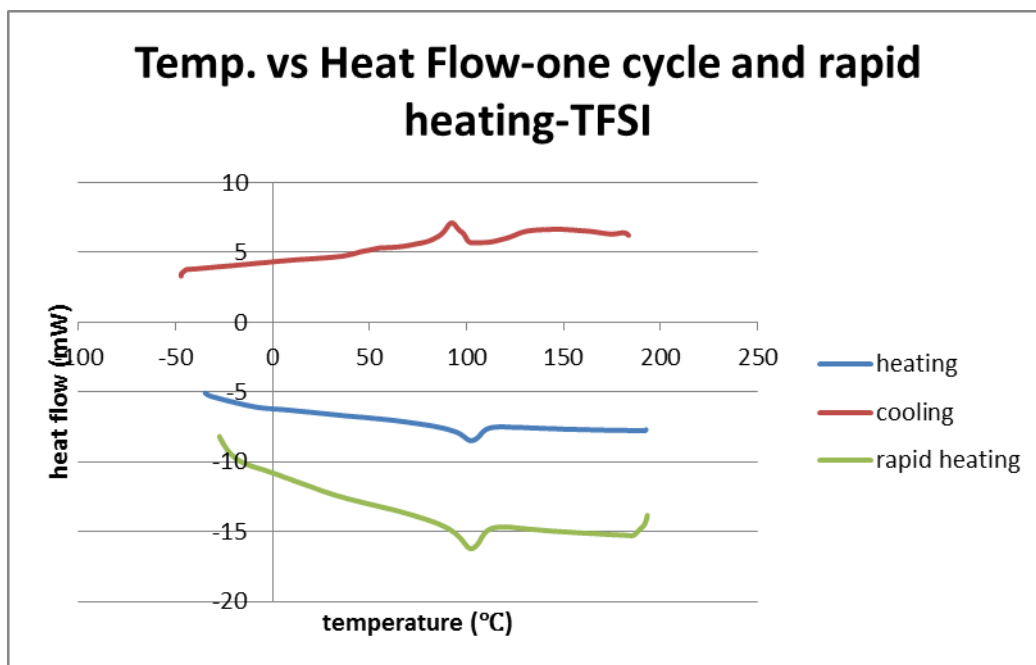

**Figure S3** - DSC scans of P23DMVIm<sup>+</sup>TFSI<sup>-</sup> during heating and subsequent cooling. The green line is from a final heating cycle at 40° per min.

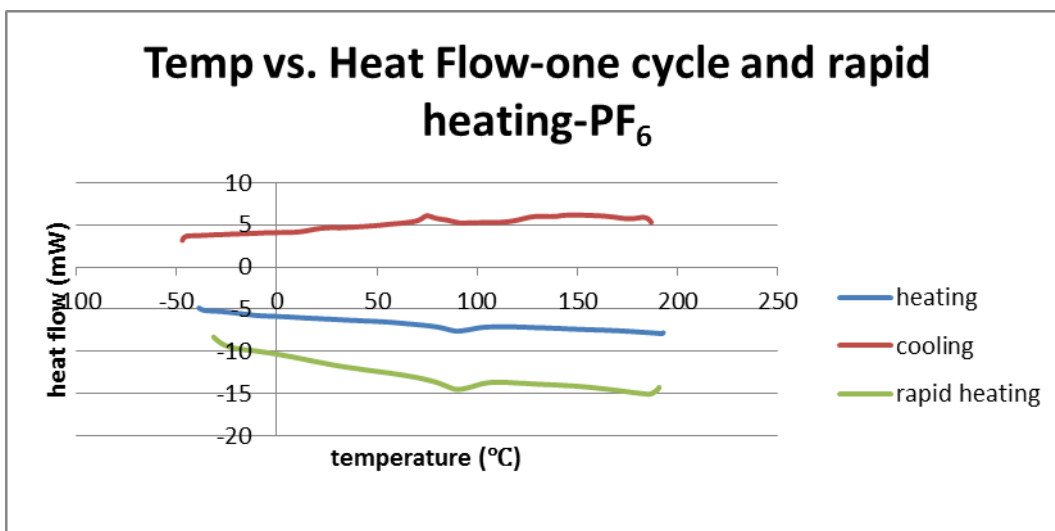

**Figure S4** - DSC scans of P23DMVIm<sup>+</sup>PF<sub>6</sub><sup>-</sup>: solid blue line (20°C/min – heating cycle), dotted red line (20°C/min – cooling cycle), dashed green line (40°C/min – rapid heating cycle).

The TFSI<sup>-</sup> salt exhibited a  $T_g$  of 96°C – 102°C in the heating cycle and 92 °C – 84 °C in the cooling cycle. The hexafluorophosphate anion is less solvating and smaller than TFSI<sup>-</sup>, yet it exhibits a somewhat lower  $T_g$  than that of the TFSI<sup>-</sup> salt.

The  $^1\text{H}$  NMR of 2-methyl-4-vinylimidazole is shown in **Figure S5**.

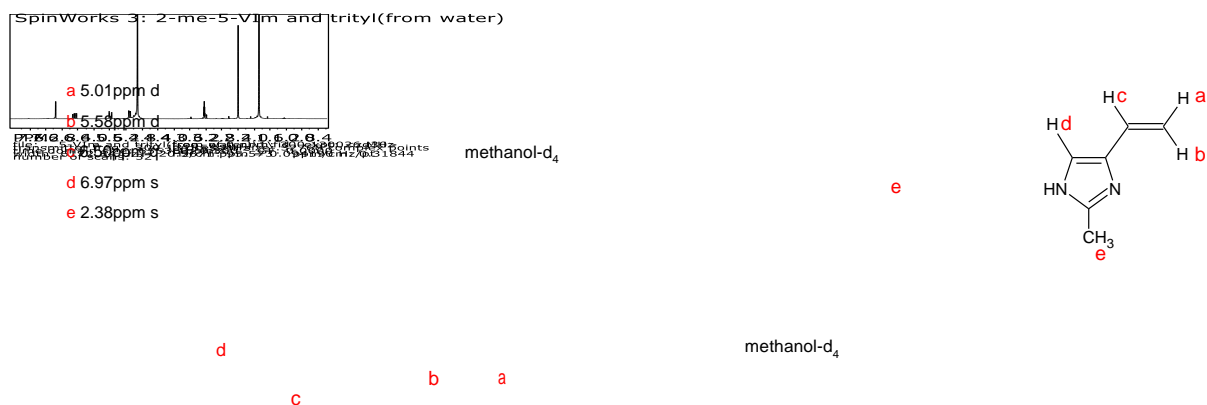

**Figure S5.  $^1\text{H}$  NMR of 2-methyl-4-vinylimidazole**

H<sub>a</sub> and H<sub>b</sub> are in different chemical environments and they are coupled with each other and with H<sub>c</sub> to yield split doublets. H<sub>c</sub> is also a pair of split doublets, a result of coupling to both H<sub>a</sub> and H<sub>b</sub>. H<sub>d</sub> on the imidazole ring shows a singlet at 6.97ppm and the methyl hydrogens at the 2-position exhibit a chemical shift of 2.38ppm. The sharp singlet at around 1.9 ppm is due to residual cyclohexane, which was the solvent of n-butyl lithium.

The  $^1\text{H}$  NMR of 1-butyl-2-methyl-4-vinylimidazole is shown in **Figure S6**.

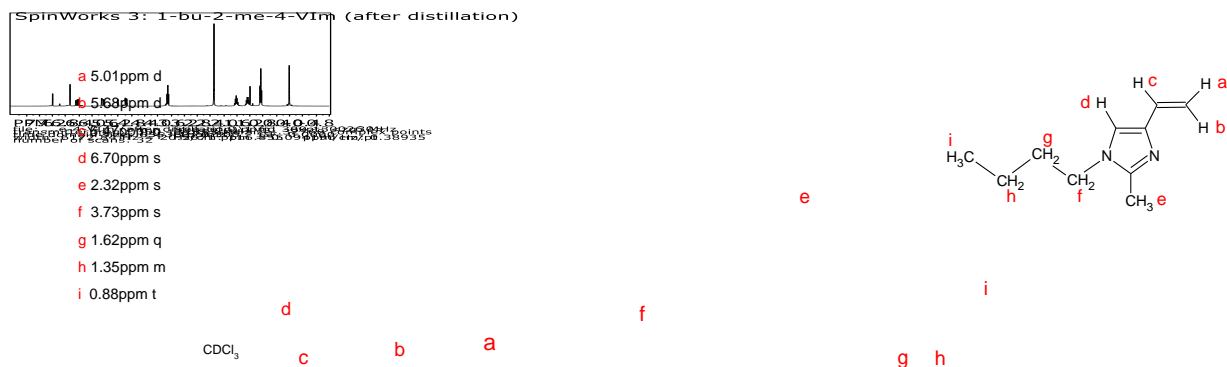

**Figure S6.  $^1\text{H}$  NMR of 1-butyl-2-methyl-4-vinylimidazole**

The  $^1\text{H}$  NMR of 1-butyl-2,3-dimethyl-4-vinylimidazolium triflate is shown in **Figure S7**. The 3-position methyl hydrogen has a chemical shift of 3.73ppm. Hf is more up field than Hg because hydrogens on the methyl group are shielded by the cone of the pi-cloud of the vinyl group.

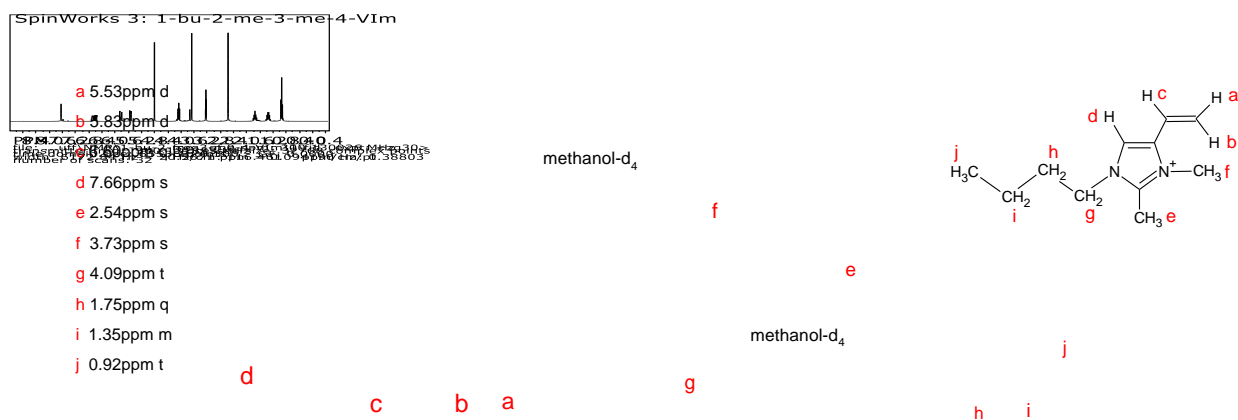

**Figure S7.  $^1\text{H}$  NMR of 1-butyl-2,3-dimethyl-4-vinylimidazolium triflate**

The  $^1\text{H}$  NMR spectrum of Poly(1-butyl-2,3-dimethyl-4-vinylimidazolium) triflate is displayed in **Figure S8**

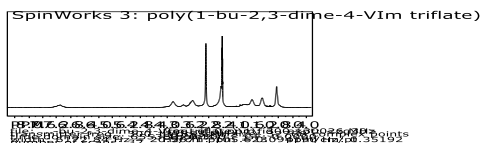

**Figure S8**  $^1\text{H}$  NMR spectrum of Poly(1-butyl-2,3-dimethyl-4-vinylimidazolium) triflate

Poly(1-butyl-2,3-dimethyl-4-vinylimidazolium triflate) was ion-exchanged with  $(\text{CF}_3\text{SO}_2)_2\text{N}^-$  and  $\text{PF}_6^-$ . The efficacy of the ion-exchange process described in the Experimental Section of the paper was verified by the comparative  $^{19}\text{F}$  NMR spectra of poly(1-butyl-2,3-dimethyl-4-vinylimidazolium triflate) (**Figure S9**) and poly(1-butyl-2,3-dimethyl-4-vinylimidazolium hexafluorophosphate) (**Figure S10**), respectively, in which the  $^{19}\text{F}$  NMR spectrum of the fully ion-exchanged hexafluorophosphate polymer shows no trace of a peak at  $\sim 78$  ppm corresponding to  $^{19}\text{F}$  in  $\text{CF}_3\text{SO}_3^-$ .

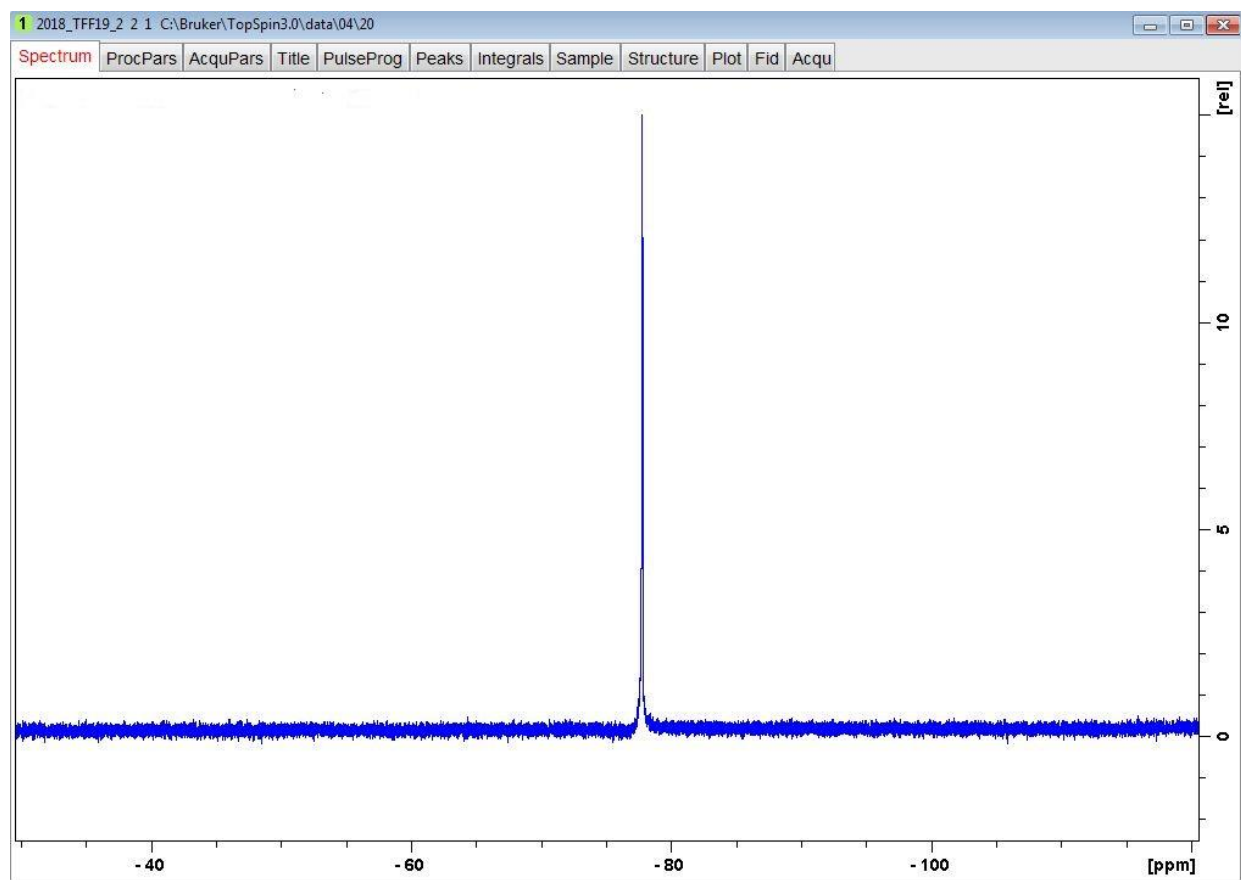

**Figure S9 -  $^{19}\text{F}$  NMR spectrum of poly(1-butyl-2,3-dimethyl-4-vinylimidazolium triflate)**



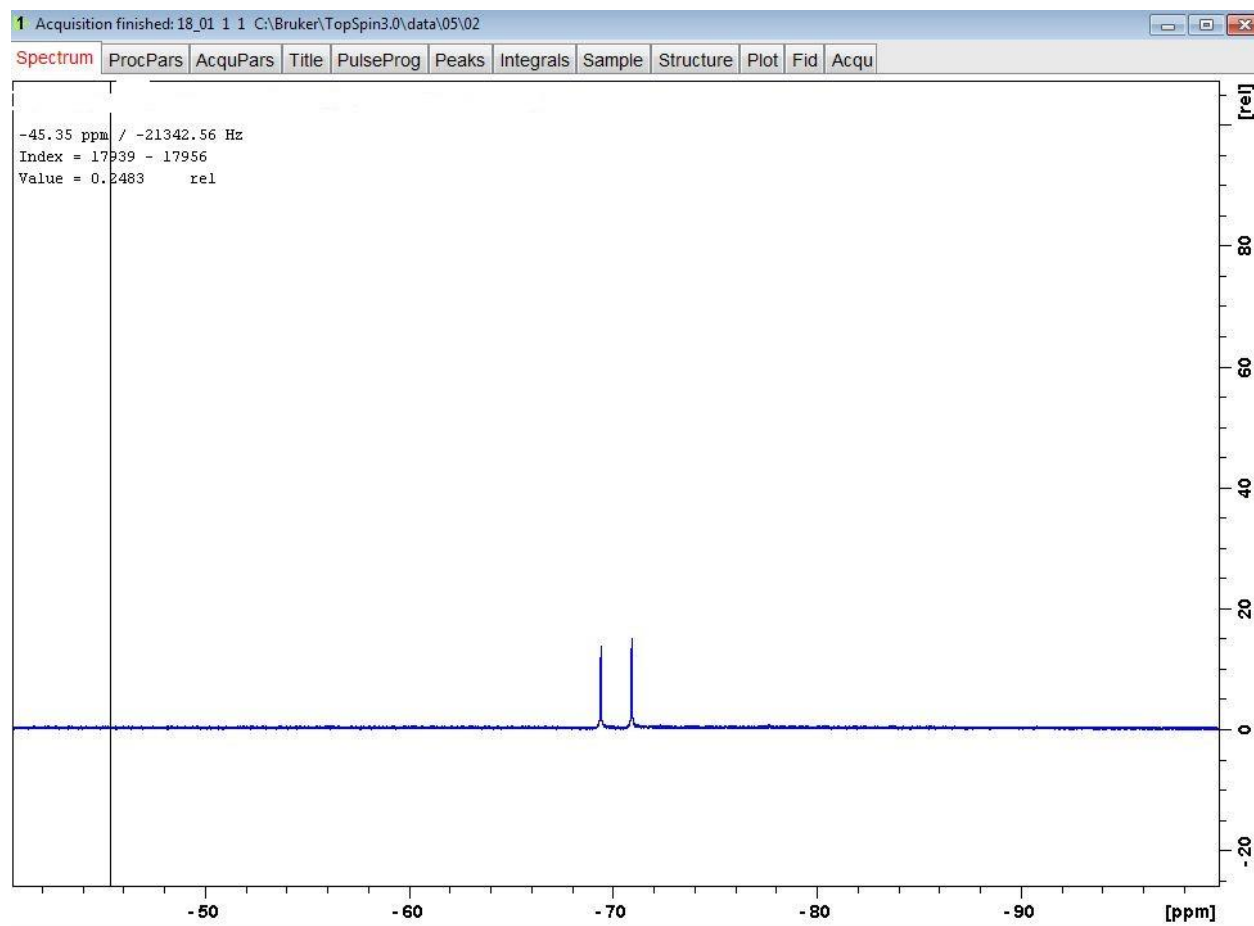

**Figure S10 -  $^{19}\text{F}$  NMR Spectrum of Poly(1-butyl-2,3-dimethyl-4-vinylimidazolium hexafluorophosphate)**
